# Supplementary material for: Understanding Physicochemical Mechanisms of Sequential Infiltration Synthesis toward Rational Process Design for Uniform Incorporation of Metal Oxides
Source: Sensors (Basel). 2022 Aug 16;22(16):6132. doi: 10.3390/s22166132 (PMC9416371; doi:10.3390/s22166132)
Supplement: Supplementary file 1 [file sensors-22-06132-s001.zip › sensors-1809134-supplementary.pdf]

**Supporting Information:**  
**Understanding Physicochemical Mechanisms of Sequential Infiltration**  
**Synthesis toward Rational Process Design for Uniform Incorporation of**  
**Metal Oxides**

*Jiwoong Ham,<sup>1</sup> Minkyung Ko,<sup>1</sup> Boyun Choi,<sup>1</sup> Hyeong-U Kim,<sup>2</sup> and Nari Jeon<sup>1,\*</sup>*

<sup>1</sup> Department of Materials Science and Engineering, Chungnam National University, Daejeon 34134, Republic of Korea

<sup>2</sup> Department of Plasma Engineering, Korea Institute of Machinery & Materials (KIMM), Daejeon 34103, Republic of Korea

Corresponding author: [njeon@cnu.ac.kr](mailto:njeon@cnu.ac.kr)

1. Experimental Conditions

**Table S1.** Precursor dose, exposure, and purge time for the data used in Figure 1.

| Figure 1<br>Temperature<br>[°C] | TMA      |              |           | H <sub>2</sub> O |              |           |
|---------------------------------|----------|--------------|-----------|------------------|--------------|-----------|
|                                 | Dose [s] | Exposure [s] | Purge [s] | Dose [s]         | Exposure [s] | Purge [s] |
| 80                              | 2        | 1800         | 1200      | 2                | 600          | 600       |

**Table S2.** Precursor dose, exposure, and purge time for the data used in Figure 2.

| Figure 2<br>Temperature [°C] | TMA      |              |           |
|------------------------------|----------|--------------|-----------|
|                              | Dose [s] | Exposure [s] | Purge [s] |
| 80                           | 2        | 2450         | 5         |
| 90                           | 2        | 610          | 5         |
| 100                          | 2        | 260          | 5         |
| 110                          | 2        | 52           | 5         |
| 120                          | 2        | 26           | 5         |
| 130                          | 2        | 3            | 5         |
| 140                          | 2        | 300          | 5         |
| 155                          | 2        | 300          | 5         |
| 170                          | 2        | 300          | 5         |
| 185                          | 2        | 300          | 5         |
| 200                          | 2        | 300          | 5         |

**Table S3.** Precursor dose, exposure, and purge time for the data used in Figure 3.

| Figure 3a<br>Temperature [°C] | TMA      |              |           |
|-------------------------------|----------|--------------|-----------|
|                               | Dose [s] | Exposure [s] | Purge [s] |
| 80                            | 2        | 4000         | 5         |
| 90                            | 2        | 4000         | 5         |
| 100                           | 2        | 3500         | 5         |
| 110                           | 2        | 2000         | 5         |
| 120                           | 2        | 1500         | 5         |
| 130                           | 2        | 600          | 5         |

| Figure 3b        |          | TMA          |           |
|------------------|----------|--------------|-----------|
| Temperature [°C] | Dose [s] | Exposure [s] | Purge [s] |
| 80               | 2        | 1800         | 10000     |
| 90               | 2        | 610          | 6000      |
| 100              | 2        | 260          | 2500      |
| 110              | 2        | 52           | 2000      |
| 120              | 2        | 26           | 1500      |
| 130              | 2        | 3            | 1000      |

**Table S4.** Precursor dose, exposure, and purge time for the data used in Figure 4.

| Figure 4a        |          | TMA          |           | H <sub>2</sub> O |              |           |
|------------------|----------|--------------|-----------|------------------|--------------|-----------|
| Temperature [°C] | Dose [s] | Exposure [s] | Purge [s] | Dose [s]         | Exposure [s] | Purge [s] |
| 80               | 2        | 2450         | 5         | 2                | 600          | 600       |
| 90               | 2        | 610          | 5         | 2                | 600          | 600       |
| 100              | 2        | 260          | 5         | 2                | 600          | 600       |
| 110              | 2        | 52           | 5         | 2                | 600          | 600       |
| 120              | 2        | 26           | 5         | 2                | 600          | 600       |
| 130              | 2        | 3            | 5         | 2                | 600          | 600       |

  

| Figure 4b        |          | TMA          |           | H <sub>2</sub> O |              |           |
|------------------|----------|--------------|-----------|------------------|--------------|-----------|
| Temperature [°C] | Dose [s] | Exposure [s] | Purge [s] | Dose [s]         | Exposure [s] | Purge [s] |
| 80               | 2        | 2450         | 1516      | 2                | 600          | 600       |
| 90               | 2        | 610          | 636       | 2                | 600          | 600       |
| 100              | 2        | 260          | 248       | 2                | 600          | 600       |
| 110              | 2        | 52           | 160       | 2                | 600          | 600       |
| 120              | 2        | 26           | 97        | 2                | 600          | 600       |
| 130              | 2        | 3            | 65        | 2                | 600          | 600       |

**Table S5.** Precursor dose, exposure, and purge time for the data used in Figure 5.

| Single Temp. 1cy |          | TMA          |           |          | H <sub>2</sub> O |           |  | Number of cycles |
|------------------|----------|--------------|-----------|----------|------------------|-----------|--|------------------|
| Temperature [°C] | Dose [s] | Exposure [s] | Purge [s] | Dose [s] | Exposure [s]     | Purge [s] |  |                  |
| 80               | 2        | 1800         | 600       | 2        | 600              | 600       |  | 1                |

  

| Single Temp. 5cy |          | TMA          |           |          | H <sub>2</sub> O |           |  | Number of cycles |
|------------------|----------|--------------|-----------|----------|------------------|-----------|--|------------------|
| Temperature [°C] | Dose [s] | Exposure [s] | Purge [s] | Dose [s] | Exposure [s]     | Purge [s] |  |                  |
| 80               | 2        | 1800         | 600       | 2        | 600              | 600       |  | 5                |

  

| Two Temp. 5cy    |          | TMA                              |           |          | H <sub>2</sub> O |           |  | Number of cycles |
|------------------|----------|----------------------------------|-----------|----------|------------------|-----------|--|------------------|
| Temperature [°C] | Dose [s] | Exposure [s]                     | Purge [s] | Dose [s] | Exposure [s]     | Purge [s] |  |                  |
| 80               | 2        | 1800                             | 600       | 2        | 600              | 600       |  | 1                |
| 130              |          | 2500 (Heating and stabilization) |           |          |                  |           |  | 1                |
| 130              | 2        | 600                              | 600       | 2        | 600              | 600       |  | 4                |

**Table S6.** Precursor dose, exposure, and purge time for the data used in Figure 6.

| Single Temp.<br>5cy<br>Temperature<br>[°C] | TMA      |              |           | H <sub>2</sub> O |              |           | Number of<br>cycles |
|--------------------------------------------|----------|--------------|-----------|------------------|--------------|-----------|---------------------|
|                                            | Dose [s] | Exposure [s] | Purge [s] | Dose [s]         | Exposure [s] | Purge [s] |                     |
| 80                                         | 2        | 1800         | 600       | 2                | 600          | 600       | 5                   |

| Two Temp.<br>5cy<br>Temperature<br>[°C] | TMA      |              |                                  | H <sub>2</sub> O |              |           | Number of<br>cycles |
|-----------------------------------------|----------|--------------|----------------------------------|------------------|--------------|-----------|---------------------|
|                                         | Dose [s] | Exposure [s] | Purge [s]                        | Dose [s]         | Exposure [s] | Purge [s] |                     |
| 80                                      | 2        | 1800         | 600                              | 2                | 600          | 600       | 1                   |
| 130                                     |          |              | 2500 (Heating and stabilization) |                  |              |           | 1                   |
| 130                                     | 2        | 600          | 600                              | 2                | 600          | 600       | 4                   |

## 2. *in situ* FTIR Spectroscopy

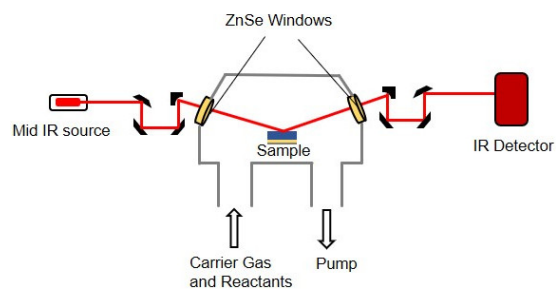

**Figure S1.** Schematic of the *in situ* FTIR spectrometer setup connected with a thermal ALD reactor.

### 3. Analysis of diffusion constant

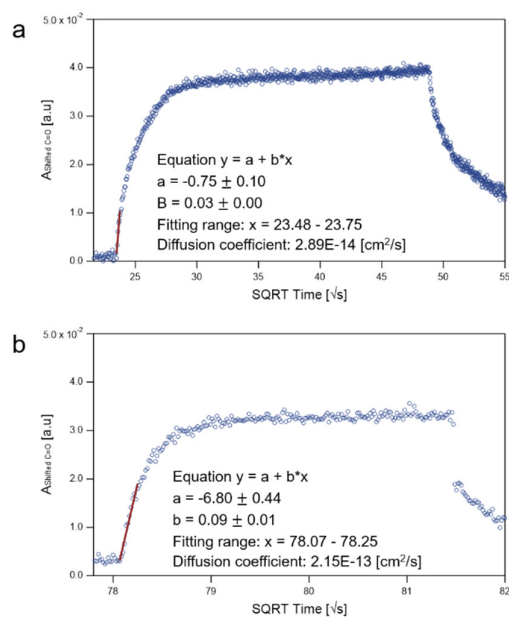

**Figure S2.** Calculation of diffusion coefficients in the 1<sup>st</sup> TMA exposure step when growth temperatures are (a) 80 °C and (b) 100 °C

#### 4. XPS analysis at different etch levels

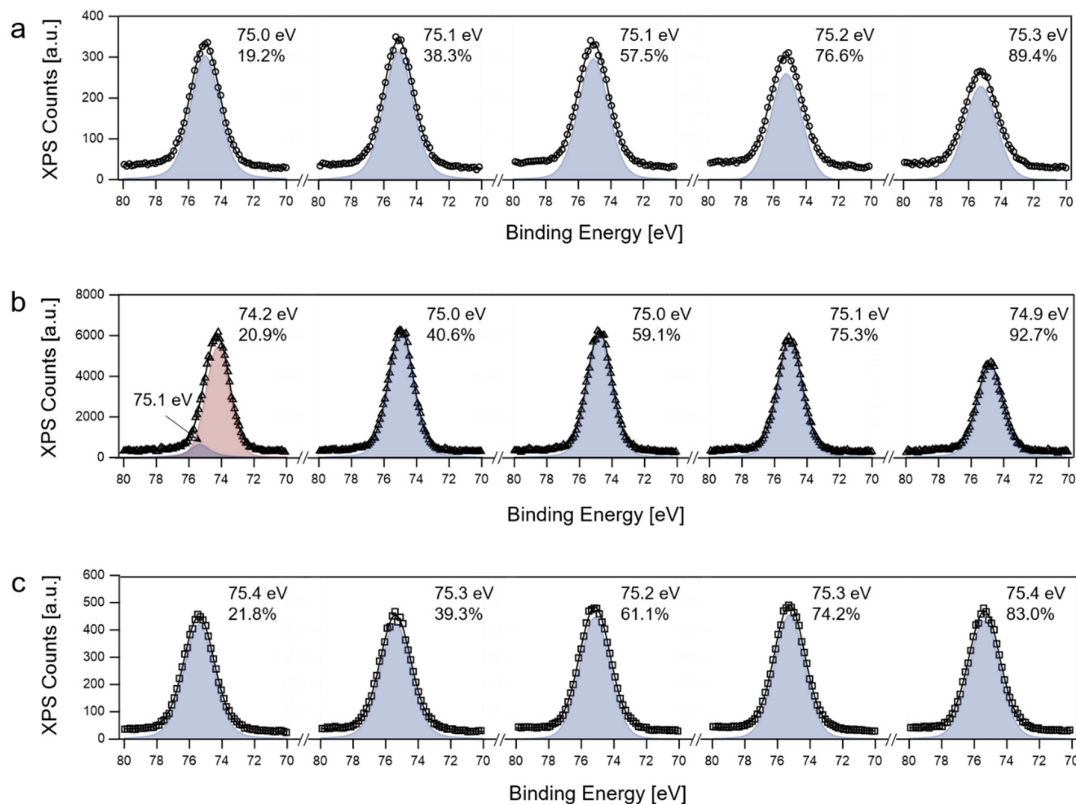

**Figure S3.** HRXPS at different etch levels for (a) single-temperature one-cycle SIS, (b) single-temperature five-cycle SIS, and (c) two-temperature five-cycle SIS. Each etch level (see **Figure 4(a)**) is denoted in the corresponding panels

## 5. Effects of traces of water

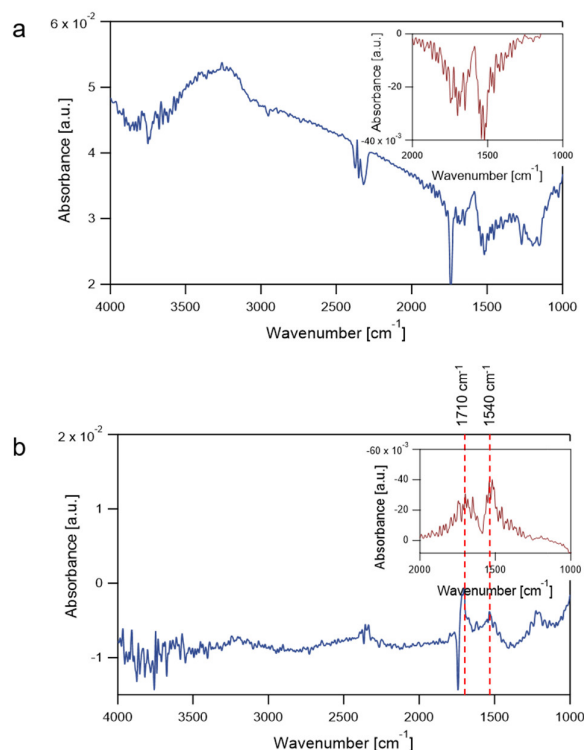

**Figure S4.** Absorbance spectra collected at the end of the 5<sup>th</sup> H<sub>2</sub>O purge step (a) in two-temperature five-cycle SIS experiments and (b) in the single-temperature five-cycle SIS. Both spectra were compared with the absorbance spectrum (inset) from a pristine PMMA collected after the temperature was increased from 80 °C to 130 °C (background spectrum: a pristine PMMA at 80 °C). The inset of (b) is drawn with an inverted Y-axis.

**The inset of Figure S4(a)** displays the loss of the H<sub>2</sub>O molecules (i.e., negative peaks) in the reaction chamber. Comparing the spectra in **Figure S4(a)** and its **inset** indicates that the peaks in the spectra in the range of 2000 – 1000 cm<sup>-1</sup> in **Figure S4(a)** are due to the decreased concentration of H<sub>2</sub>O molecules in the chamber. The absorbance spectrum shown in **Figure S4(b)** is similar to that given in the **inset**, which is drawn with an inverted Y-axis for a better comparison with it in the same wavenumber range (2000 – 1000 cm<sup>-1</sup>) in **Figure S4(b)**. The peaks in the range of 2000 – 1000 cm<sup>-1</sup> in **Figure S4(b)** originate from the H<sub>2</sub>O molecules present at an increased concentration in the reaction chamber.

## 6. Single-temperature five-cycle SIS at 80 °C

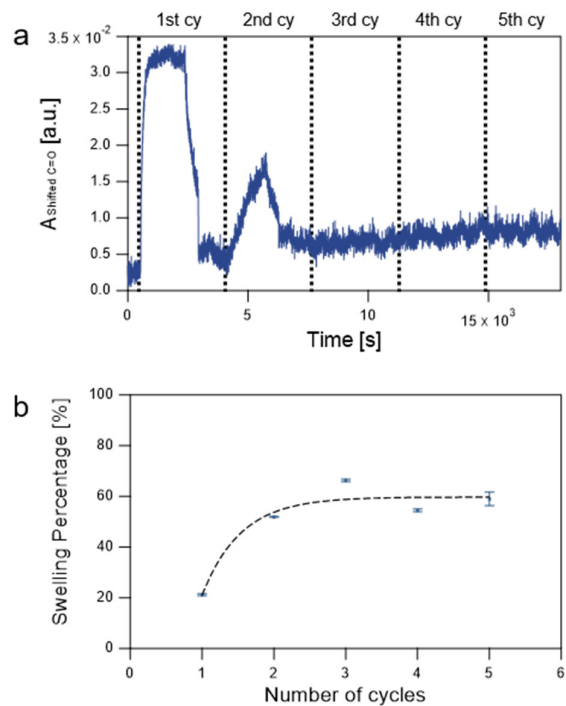

**Figure S5.** (a) Absolute values of the absorbance of the shifted C=O band as a function of time and (b) swelling percentage as a function of the number of SIS cycles in the single-temperature SIS experiment at 80 °C

## 7. Background fitting process

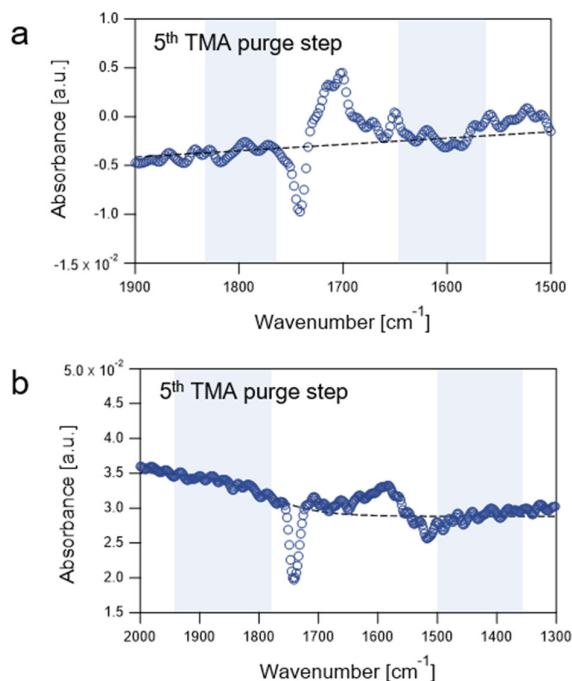

**Figure S6.** Examples of background fitting processes for (a) single-temperature five-cycle SIS and (b) two-temperature five-cycle SIS experiments. The wavenumber range used to fit the baseline is represented by blue-shaded areas. The fitted background lines are shown as dashed lines.

The aforementioned examples show the absorbance spectra collected at the end of the 5<sup>th</sup> TMA purge steps in each SIS experiment. A linear function was used to fit the background of the absorbance spectra from the single-temperature five-cycle SIS experiment (**Figure S6(a)**). A sigmoid function was used to fit the background of the absorbance spectra from the two-temperature five-cycle SIS experiment (**Figure S6(b)**).

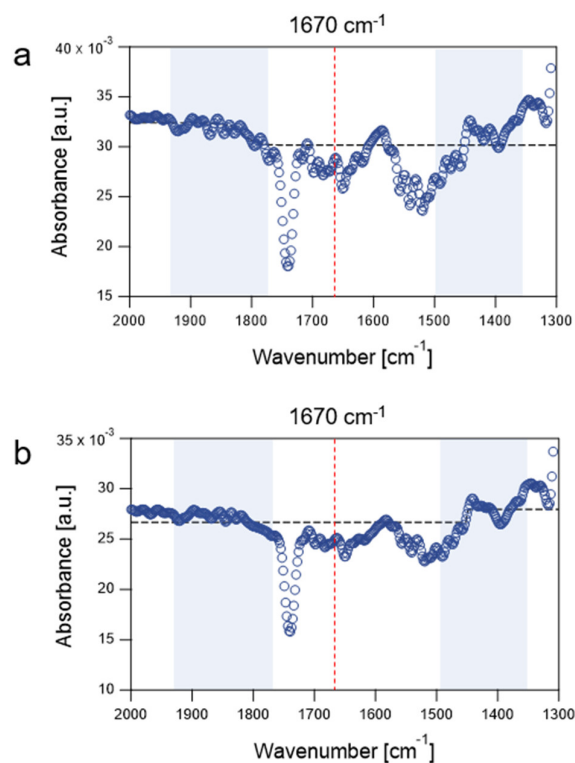

**Figure S7.** Absorbance spectrum recorded at the end of (a) the 4<sup>th</sup> and (b) the 5<sup>th</sup> TMA exposure steps in the two-temperature five-cycle SIS experiment. The wavenumber range used to fit the baseline is represented by blue-shaded areas. The fitted background lines are shown as dashed lines.

As shown in **Figure S7**, the absolute values of the absorbance of the shifted C=O band (1670 cm<sup>-1</sup>) in the 4<sup>th</sup> and the 5<sup>th</sup> TMA exposure steps were nil, similar to the noise level.
